# Supplementary material for: Pattern Recognition and Deep Learning Technologies, Enablers of Industry 4.0, and Their Role in Engineering Research
Source: MDPI journal article supplement (doi:10.3390/sym15020535), 2023-02-17
Supplement: s1 [file s1]

**Table S1.** Table of references.

| Authors                  | Journals                                                           | Year | h5 index | SJR index | Quartile | # of citations |
|--------------------------|--------------------------------------------------------------------|------|----------|-----------|----------|----------------|
| Wang et al. [21].        | Expert Systems with Applications                                   | 2021 | 164      | 1.37      | Q1       | 4              |
| Biggio and Roli [28].    | Pattern Recognition                                                | 2018 | 141      | 1.49      | Q1       | 835            |
| Wu et al. [33].          | IEEE Transactions on Cybernetics                                   | 2019 | 132      | 3.11      | Q1       | 179            |
| Lu et al. [34].          | IEEE Transactions on Biomedical Engineering                        | 2019 | 114      | 1.15      | Q1       | 48             |
| Hu et al. [35].          | Tourism Management                                                 | 2021 | 164      | 3.33      | Q1       | 10             |
| Cao et al. [36].         | Molecules                                                          | 2019 | 72       | 1.4       | Q1       | 6              |
| Shi et al. [37].         | IEEE Transactions on Neural Systems and Rehabilitation Engineering | 2020 | 86       | 1.09      | Q1       | 10             |
| Bulgarevich et al. [38]. | Scientific Reports                                                 | 2018 | 262      | 1.24      | Q1       | 86             |
| Entezami et al. [39].    | Sensors                                                            | 2020 | 179      | 0.64      | Q2       | 46             |
| Cao et al. [40].         | IEEE Transactions on Mobile Computing                              | 2020 | 97       | 1.28      | Q1       | 31             |
| Ignatov [41].            | Applied Soft Computing                                             | 2018 | 133      | 1.29      | Q1       | 440            |
| Lu et al. [42].          | Sensors                                                            | 2018 | 179      | 0.64      | Q2       | 7              |
| Seo et al. [43].         | Nature Communications                                              | 2020 | 389      | 5.56      | Q1       | 39             |
| Cao et al. [44].         | Molecules                                                          | 2018 | 72       | 1.4       | Q1       | 17             |
| Wang et al. [45].        | Pattern Recognition Letters                                        | 2019 | 93       | 0.67      | Q1       | 1105           |
| Liu et al. [46].         | IEEE/CAA Journal of Automatica Sinica                              | 2017 | 69       | 1.28      | Q1       | 42             |
| Wen et al. [47].         | Journal of Cleaner Production                                      | 2019 | 245      | 1.94      | Q1       | 56             |
| Kong et al. [48].        | IEEE/ACM Transactions on Audio, Speech, and Language Processing    | 2020 | 87       | 0.92      | Q1       | 210            |
| Gan et al. [49].         | Mechanical Systems and Signal Processing                           | 2016 | 142      | 2.28      | Q1       | 430            |
| Sharma et al. [50].      | Transportation Research Part C: Emerging Technologies              | 2018 | 133      | 3.19      | Q1       | 24             |
| Ruiz-Tamayo et al. [51]. | Mathematics                                                        | 2021 | 54       | 0.5       | Q1       | 1              |
| Licen et al. [52].       | Sensors                                                            | 2020 | 179      | 0.64      | Q2       | 6              |
| Hafezi et al. [53].      | Transportation                                                     | 2019 | 72       | 1.95      | Q1       | 45             |
| Huang et al. [54].       | Journal of Integrative Agriculture                                 | 2018 | 56       | 0.78      | Q1       | 182            |
| Zan et al. [55].         | Journal of Intelligent Manufacturing                               | 2020 | 86       | 1.27      | Q1       | 38             |

|                                      |                                                                    |      |     |      |    |     |
|--------------------------------------|--------------------------------------------------------------------|------|-----|------|----|-----|
| Ng et al. [56].                      | Pattern Recognition                                                | 2019 | 141 | 1.49 | Q1 | 9   |
| Seo et al. [57].                     | Nature Communications                                              | 2018 | 389 | 5.56 | Q1 | 206 |
| Alvarez-Montoya et al. [58].         | Mechanical Systems and Signal Processing                           | 2020 | 142 | 2.28 | Q1 | 42  |
| He et al. [59].                      | IEEE Transactions on Pattern Analysis and Machine Intelligence     | 2020 | 275 | 3.81 | Q1 | 632 |
| Addeh et al. [60].                   | ISA transactions                                                   | 2018 | 82  | 1.15 | Q1 | 102 |
| Teh and Hargrove [61].               | IEEE Transactions on Neural Systems and Rehabilitation Engineering | 2020 | 86  | 1.09 | Q1 | 10  |
| Melati et al. [62].                  | Nature Communications                                              | 2019 | 389 | 5.56 | Q1 | 74  |
| Addona et al. [63].                  | Journal of Intelligent Manufacturing                               | 2017 | 86  | 1.27 | Q1 | 111 |
| De La Torre Gutierrez and Pham [64]. | Computers & Industrial Engineering                                 | 2016 | 104 | 1.32 | Q1 | 40  |
| Wang et al. [65].                    | Neurocomputing                                                     | 2018 | 164 | 1.09 | Q1 | 165 |
| Abiodun et al. [66]                  | IEEE Access                                                        | 2019 | 233 | 0.59 | Q1 | 96  |
| Wang et al. [67].                    | IEEE Access                                                        | 2019 | 233 | 0.59 | Q1 | 40  |
| Hu et al. [68].                      | Energy                                                             | 2020 | 144 | 1.96 | Q1 | 39  |
| Chaitanya et al. [69].               | IEEE Transactions on Industrial Informatics                        | 2021 | 149 | 2.5  | Q1 | 13  |
| Roshani et al. [70].                 | Alexandria Engineering Journal                                     | 2021 | 79  | 0.58 | Q1 | 78  |
| Xing et al. [71].                    | Analytical Chemistry                                               | 2021 | 146 | 2.12 | Q1 | 3   |
| Zhao and Shi [72].                   | Ocean Engineering                                                  | 2019 | 75  | 1.32 | Q1 | 61  |
| Zhang and Sun [73].                  | Structural Health Monitoring                                       | 2020 | 52  | 1.23 | Q1 | 23  |
| Demin et al. [74].                   | Neural Networks                                                    | 2021 | 105 | 1.4  | Q1 | 33  |
| Syed et al. [75].                    | IEEE Access                                                        | 2021 | 233 | 0.59 | Q1 | 9   |
| Durán et al. [76].                   | Nature Communications                                              | 2021 | 389 | 5.56 | Q1 | 8   |
| Li et al. [77].                      | Neural Computing and Applications                                  | 2021 | 115 | 0.71 | Q1 | 5   |
| Astolfi et al. [78].                 | ACM Computing Surveys                                              | 2021 | 179 | 2.08 | Q1 | 4   |
| Shu and Shu [79].                    | Scientific reports                                                 | 2021 | 262 | 1.24 | Q1 | 11  |
| Wei et al. [80].                     | Neural Computing and Applications                                  | 2021 | 115 | 0.71 | Q1 | 8   |
| Urbaniak and Wolter [81].            | Communications in Nonlinear Science and Numerical Simulation       | 2021 | 87  | 1.16 | Q1 | 3   |
| Lin et al. [82].                     | Applied Soft Computing                                             | 2021 | 133 | 1.29 | Q1 | 5   |
| Ehya and Nysveen [83].               | IEEE Transactions on Industry Applications                         | 2021 | 91  | 1.19 | Q1 | 14  |
| Bai et al. [84].                     | Pattern Recognition                                                | 2021 | 141 | 1.49 | Q1 | 27  |

|                              |                                                                |      |     |      |    |       |
|------------------------------|----------------------------------------------------------------|------|-----|------|----|-------|
| Meng et al. [85].            | Journal of Intelligent Manufacturing                           | 2021 | 86  | 1.27 | Q1 | 8     |
| Qiu et al. [86].             | Construction and Building Materials                            | 2021 | 141 | 1.66 | Q1 | 5     |
| Samuel et al. [87].          | IEEE Access                                                    | 2019 | 233 | 0.59 | Q1 | 80    |
| Entezami et al. [88].        | Structural Health Monitoring                                   | 2018 | 52  | 1.23 | Q1 | 37    |
| Xu et al. [89]               | Structural Control and Health Monitoring                       | 2019 | 61  | 1.59 | Q1 | 11    |
| Kwon and Chung [90].         | IEEE Electron device letters                                   | 2020 | 91  | 1.34 | Q1 | 14    |
| Yang et al. [91].            | IEEE Transactions on Industrial Electronics                    | 2019 | 173 | 2.39 | Q1 | 25    |
| Wang [92].                   | Computers & Electrical Engineering                             | 2019 | 89  | 0.63 | Q1 | 13    |
| Montavon et al. [100].       | Pattern Recognition                                            | 2017 | 141 | 1.49 | Q1 | 867   |
| Yin et al. [101].            | IEEE Internet of Things Journal                                | 2020 | 184 | 2.08 | Q1 | 40    |
| Sariyer et al. [102].        | Annals of Operations Research                                  | 2021 | 85  | 1.07 | Q1 | 1     |
| Chen et al.[103].            | IEEE Transactions on Pattern Analysis and Machine Intelligence | 2018 | 275 | 3.81 | Q1 | 10510 |
| Wu et al. [104].             | IEEE Transactions on Neural Networks and Learning Systems      | 2020 | 171 | 2.88 | Q1 | 2907  |
| Shao et al. [105].           | IEEE Transactions on Industrial Electronics                    | 2018 | 173 | 2.39 | Q1 | 260   |
| Zhang et al. [106].          | IEEE Transactions on Circuits and Systems for Video Technology | 2020 | 110 | 0.87 | Q1 | 613   |
| Oh et al. [107]              | Neural Computing and Applications                              | 2018 | 115 | 0.71 | Q1 | 276   |
| Kong et al. [108]            | IEEE Transactions on Smart Grid                                | 2017 | 183 | 3.57 | Q1 | 1080  |
| Gama et al. [109].           | IEEE Signal Processing Magazine                                | 2020 | 111 | 2.06 | Q1 | 49    |
| Bello et al. [110].          | Nature Machine Intelligence                                    | 2019 | 95  | 4.6  | Q1 | 131   |
| Gu et al. [111].             | Pattern Recognition                                            | 2018 | 141 | 1.49 | Q1 | 2451  |
| Ashrafzadeh et al. [112].    | Hydrological Sciences Journal                                  | 2019 | 61  | 0.95 | Q1 | 27    |
| Protopapadakis et al. [113]. | Remote Sensing                                                 | 2021 | 137 | 1.29 | Q1 | 21    |
| Yang et al. [114].           | IEEE Transactions on Image Processing                          | 2019 | 187 | 1.78 | Q1 | 34    |
| Wu et al. [115].             | Transportation Research Part C: Emerging Technologies          | 2018 | 133 | 3.19 | Q1 | 393   |

|                                 |                                                                |      |     |      |    |       |
|---------------------------------|----------------------------------------------------------------|------|-----|------|----|-------|
| Lin et al. [116].               | Applied Intelligence                                           | 2020 | 94  | 1.91 | Q1 | 24    |
| Zhang et al. [117].             | IEEE Transactions on Industrial Informatics                    | 2021 | 149 | 2.5  | Q1 | 17    |
| Guo et al. [118].               | IEEE Transactions on Industrial Electronics                    | 2019 | 173 | 2.39 | Q1 | 426   |
| Karaca et al. [119].            | International Journal of Information Management                | 2019 | 164 | 2.77 | Q1 | 57    |
| Zhang et al. [120].             | Computer-Aided Civil and Infrastructure Engineering            | 2021 | 79  | 2.77 | Q1 | 11    |
| Duan et al. [121].              | Transportation Research Part C: Emerging Technologies          | 2016 | 133 | 3.19 | Q1 | 192   |
| Shorten and Khoshgoftaar [122]. | Journal of big data                                            | 2019 | 74  | 1.03 | Q1 | 2778  |
| Kosasih and Brintrup [123]      | International Journal of Production Research                   | 2021 | 139 | 1.91 | Q1 | 5     |
| Oh et al. [124].                | Structural Health Monitoring                                   | 2020 | 52  | 1.23 | Q1 | 17    |
| Zhao et al. [125].              | Knowledge-Based Systems                                        | 2019 | 127 | 1.59 | Q1 | 68    |
| Lillicrap et al. [126].         | Nature Communications                                          | 2016 | 389 | 5.56 | Q1 | 520   |
| Büsch et al. [127].             | Information Systems Frontiers                                  | 2017 | 74  | 1.09 | Q1 | 13    |
| Wen et al. [128].               | IEEE Transactions on Industrial Electronics                    | 2018 | 173 | 2.39 | Q1 | 867   |
| Waheed et al. [129]             | IEEE Access                                                    | 2020 | 233 | 0.59 | Q1 | 315   |
| Uddin et al. [130].             | IEEE Access                                                    | 2017 | 233 | 0.59 | Q1 | 119   |
| Wu et al. [131].                | Neurocomputing                                                 | 2020 | 164 | 1.09 | Q1 | 256   |
| Wang et al. [132].              | IEEE Transactions on Pattern Analysis and Machine Intelligence | 2020 | 275 | 3.81 | Q1 | 799   |
| Cortez et al. [133].            | Expert Systems with Applications                               | 2018 | 164 | 1.37 | Q1 | 107   |
| Ruiz et al. [134].              | Proceedings of the IEEE                                        | 2021 | 159 | 2.38 | Q1 | 26    |
| Ordóñez and Roggen [135].       | Sensors                                                        | 2016 | 179 | 0.64 | Q2 | 1682  |
| Yu et al [136].                 | IEEE Transactions on Neural Networks and Learning Systems      | 2019 | 171 | 2.88 | Q1 | 225   |
| Ren et al. [137].               | IEEE Transactions on Pattern Analysis and Machine Intelligence | 2017 | 275 | 3.81 | Q1 | 39699 |
| Alzubaidi et al. [138].         | Journal of Big Data                                            | 2021 | 74  | 1.03 | Q1 | 187   |
| Demir [139].                    | Applied Soft Computing                                         | 2021 | 133 | 1.29 | Q1 | 26    |
| Shi et al. [140]                | IEEE Transactions on Smart Grid                                | 2018 | 183 | 3.57 | Q1 | 567   |
| Perol et al. [141].             | Science Advances                                               | 2018 | 250 | 5.93 | Q1 | 494   |
| Fombellida et al. [142].        | Neural Computing and Applications                              | 2018 | 115 | 0.71 | Q1 | 12    |

|                         |                                                       |      |     |      |    |     |
|-------------------------|-------------------------------------------------------|------|-----|------|----|-----|
| Li et al. [143].        | Energy                                                | 2021 | 144 | 1.96 | Q1 | 5   |
| Lee et al. [144].       | Applied soft computing                                | 2021 | 133 | 1.29 | Q1 | 10  |
| Araujo et al [145].     | Plos one                                              | 2017 | 246 | 0.99 | Q1 | 636 |
| Schütt et al. [146].    | Nature Communications                                 | 2017 | 389 | 5.56 | Q1 | 910 |
| Mehdiyev et al. [147].  | Business & Information Systems Engineering            | 2020 | 80  | 1.02 | Q1 | 45  |
| Kim and Cho [148].      | Expert Systems with Applications                      | 2021 | 164 | 1.37 | Q1 | 2   |
| Frid-Adar et al. [149]. | Neurocomputing                                        | 2018 | 164 | 1.09 | Q1 | 883 |
| Guo et al. [150].       | Neurocomputing                                        | 2017 | 164 | 1.09 | Q1 | 602 |
| Chowdhury et al. [151]. | IEEE Access                                           | 2020 | 233 | 0.59 | Q1 | 583 |
| Lu et al. [152].        | IEEE Transactions on Industrial Informatics           | 2021 | 149 | 2.5  | Q1 | 6   |
| Polson et al. [153].    | Transportation Research Part C: Emerging Technologies | 2017 | 80  | 3.19 | Q1 | 696 |
| Gama et al. [154].      | IEEE Transactions on Signal Processing                | 2020 | 153 | 1.64 | Q1 | 96  |
| Liu et al. [155].       | IEEE Access                                           | 2020 | 233 | 0.59 | Q1 | 2   |
| Sun et al. [156].       | IEEE Transactions on Cybernetics                      | 2020 | 132 | 3.11 | Q1 | 268 |
| Pham et al. [157].      | Nature Machine Intelligence                           | 2021 | 95  | 4.6  | Q1 | 69  |
