# Supplementary figures and images for: Pattern Recognition and Deep Learning Technologies, Enablers of Industry 4.0, and Their Role in Engineering Research
Source: MDPI journal article supplement (doi:10.3390/sym15020535), 2023-02-17

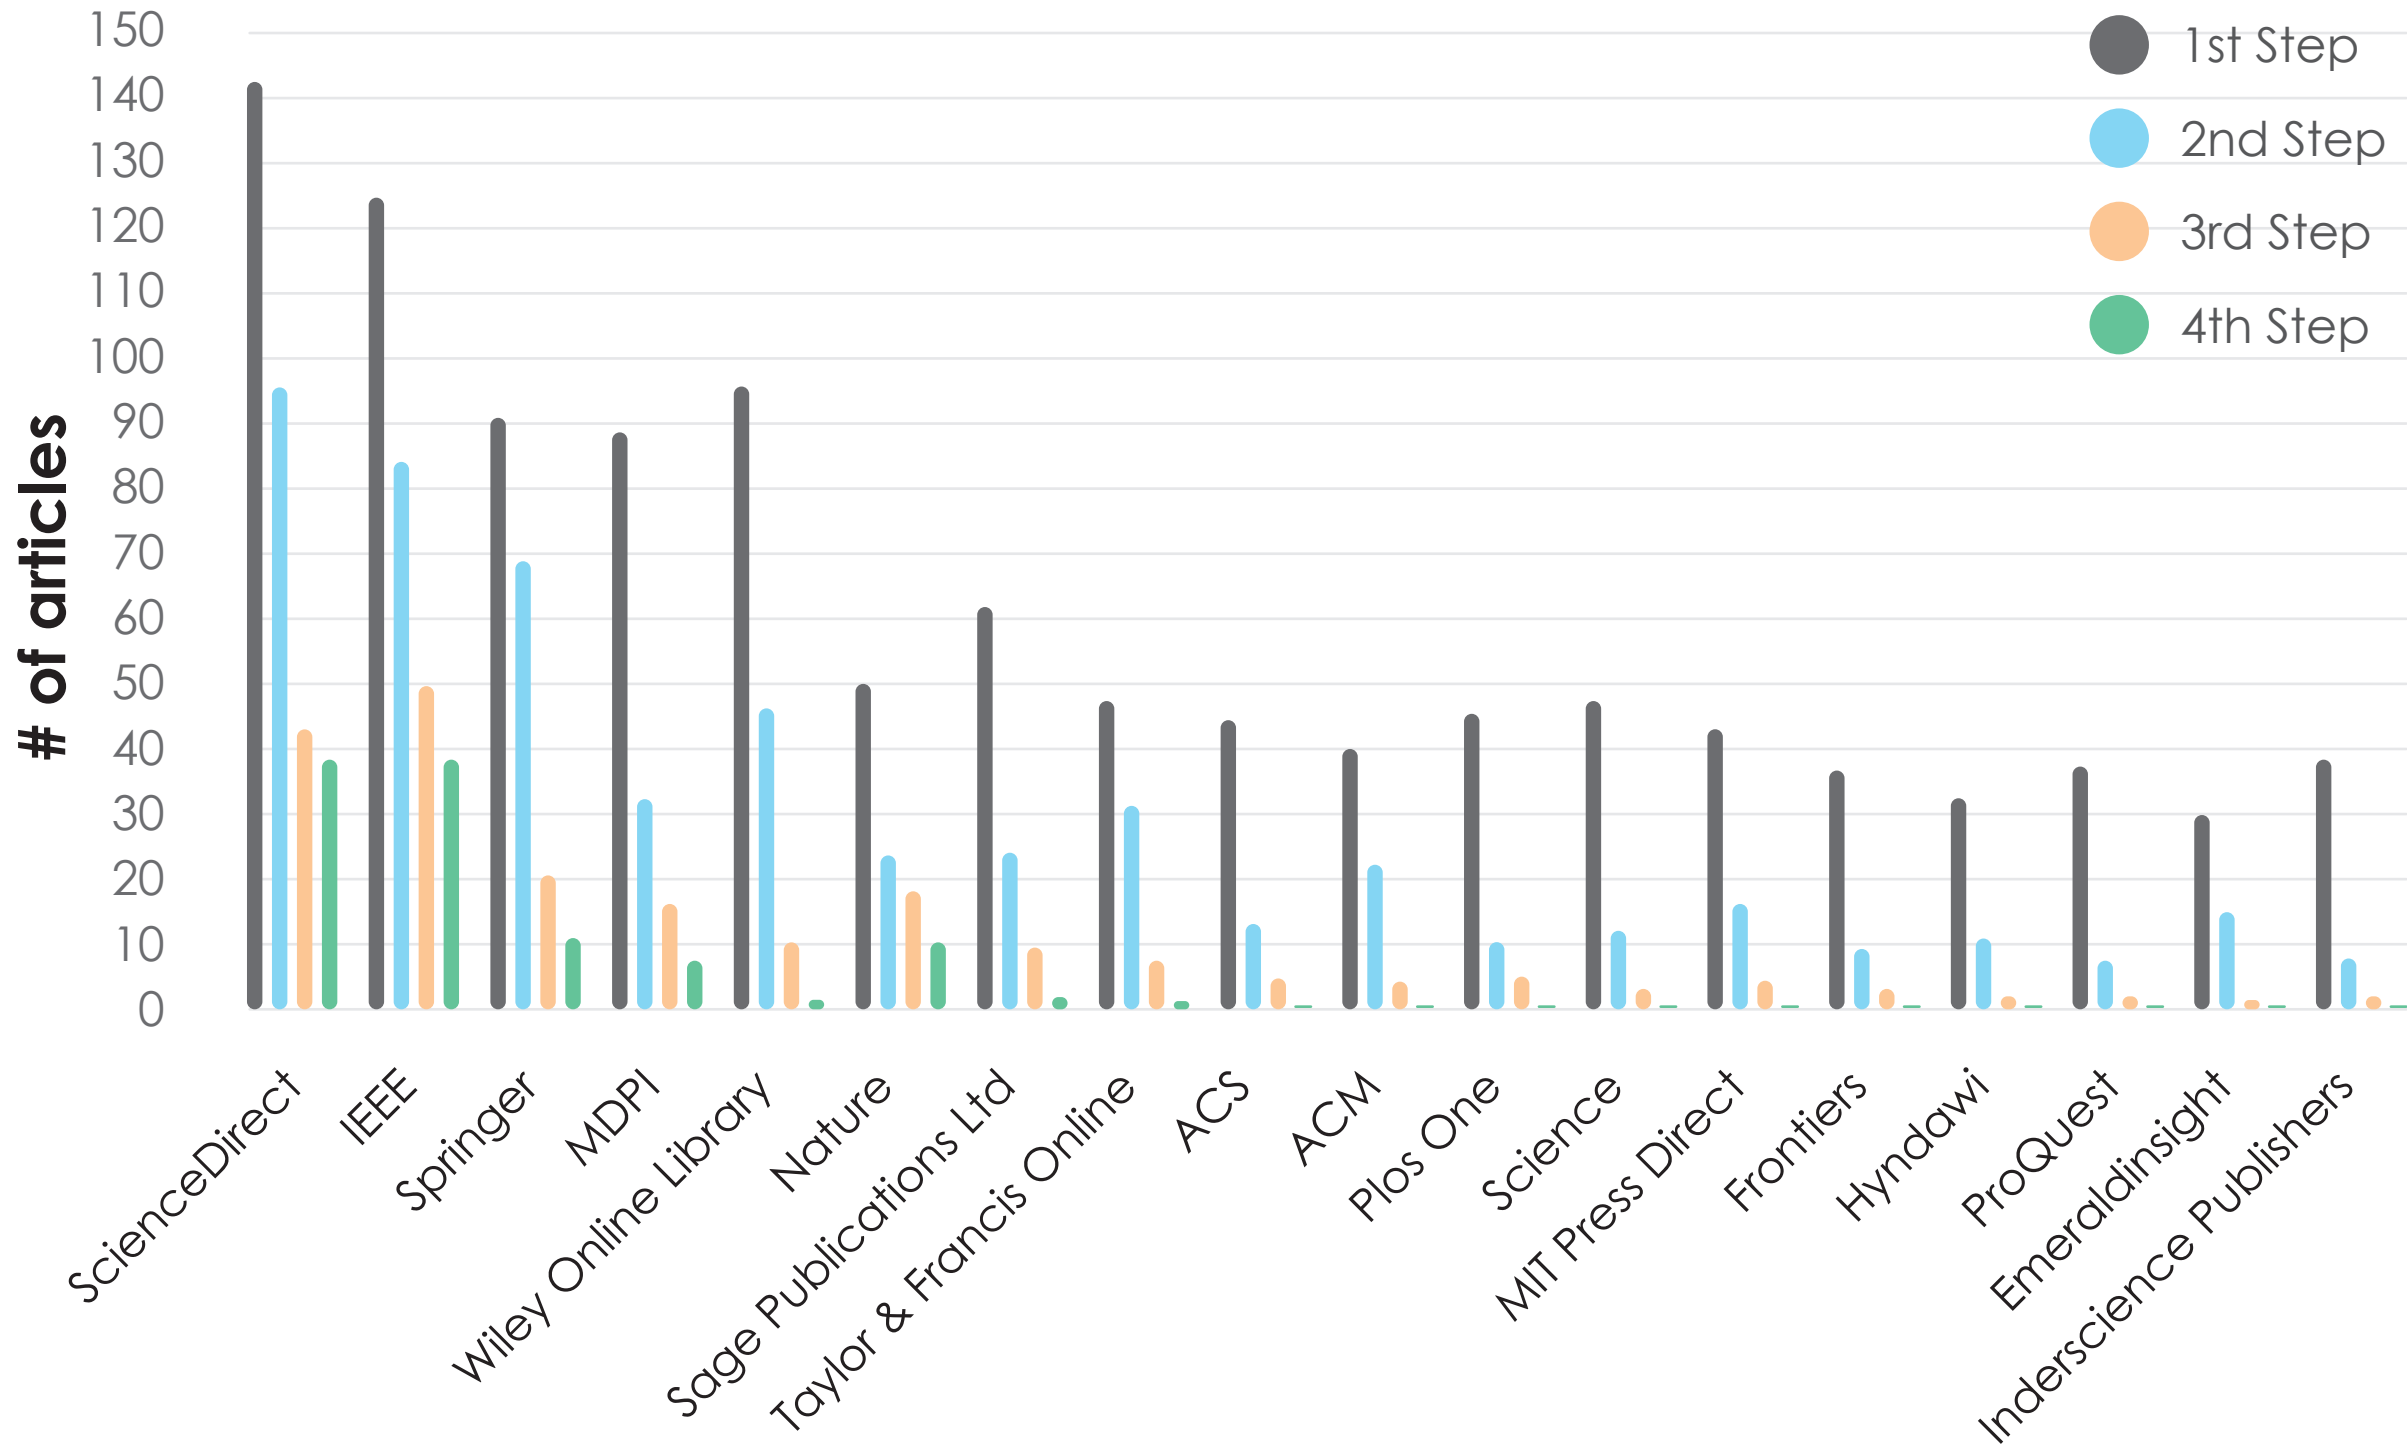

Supplement: s1 [file s1]

**# of articles**

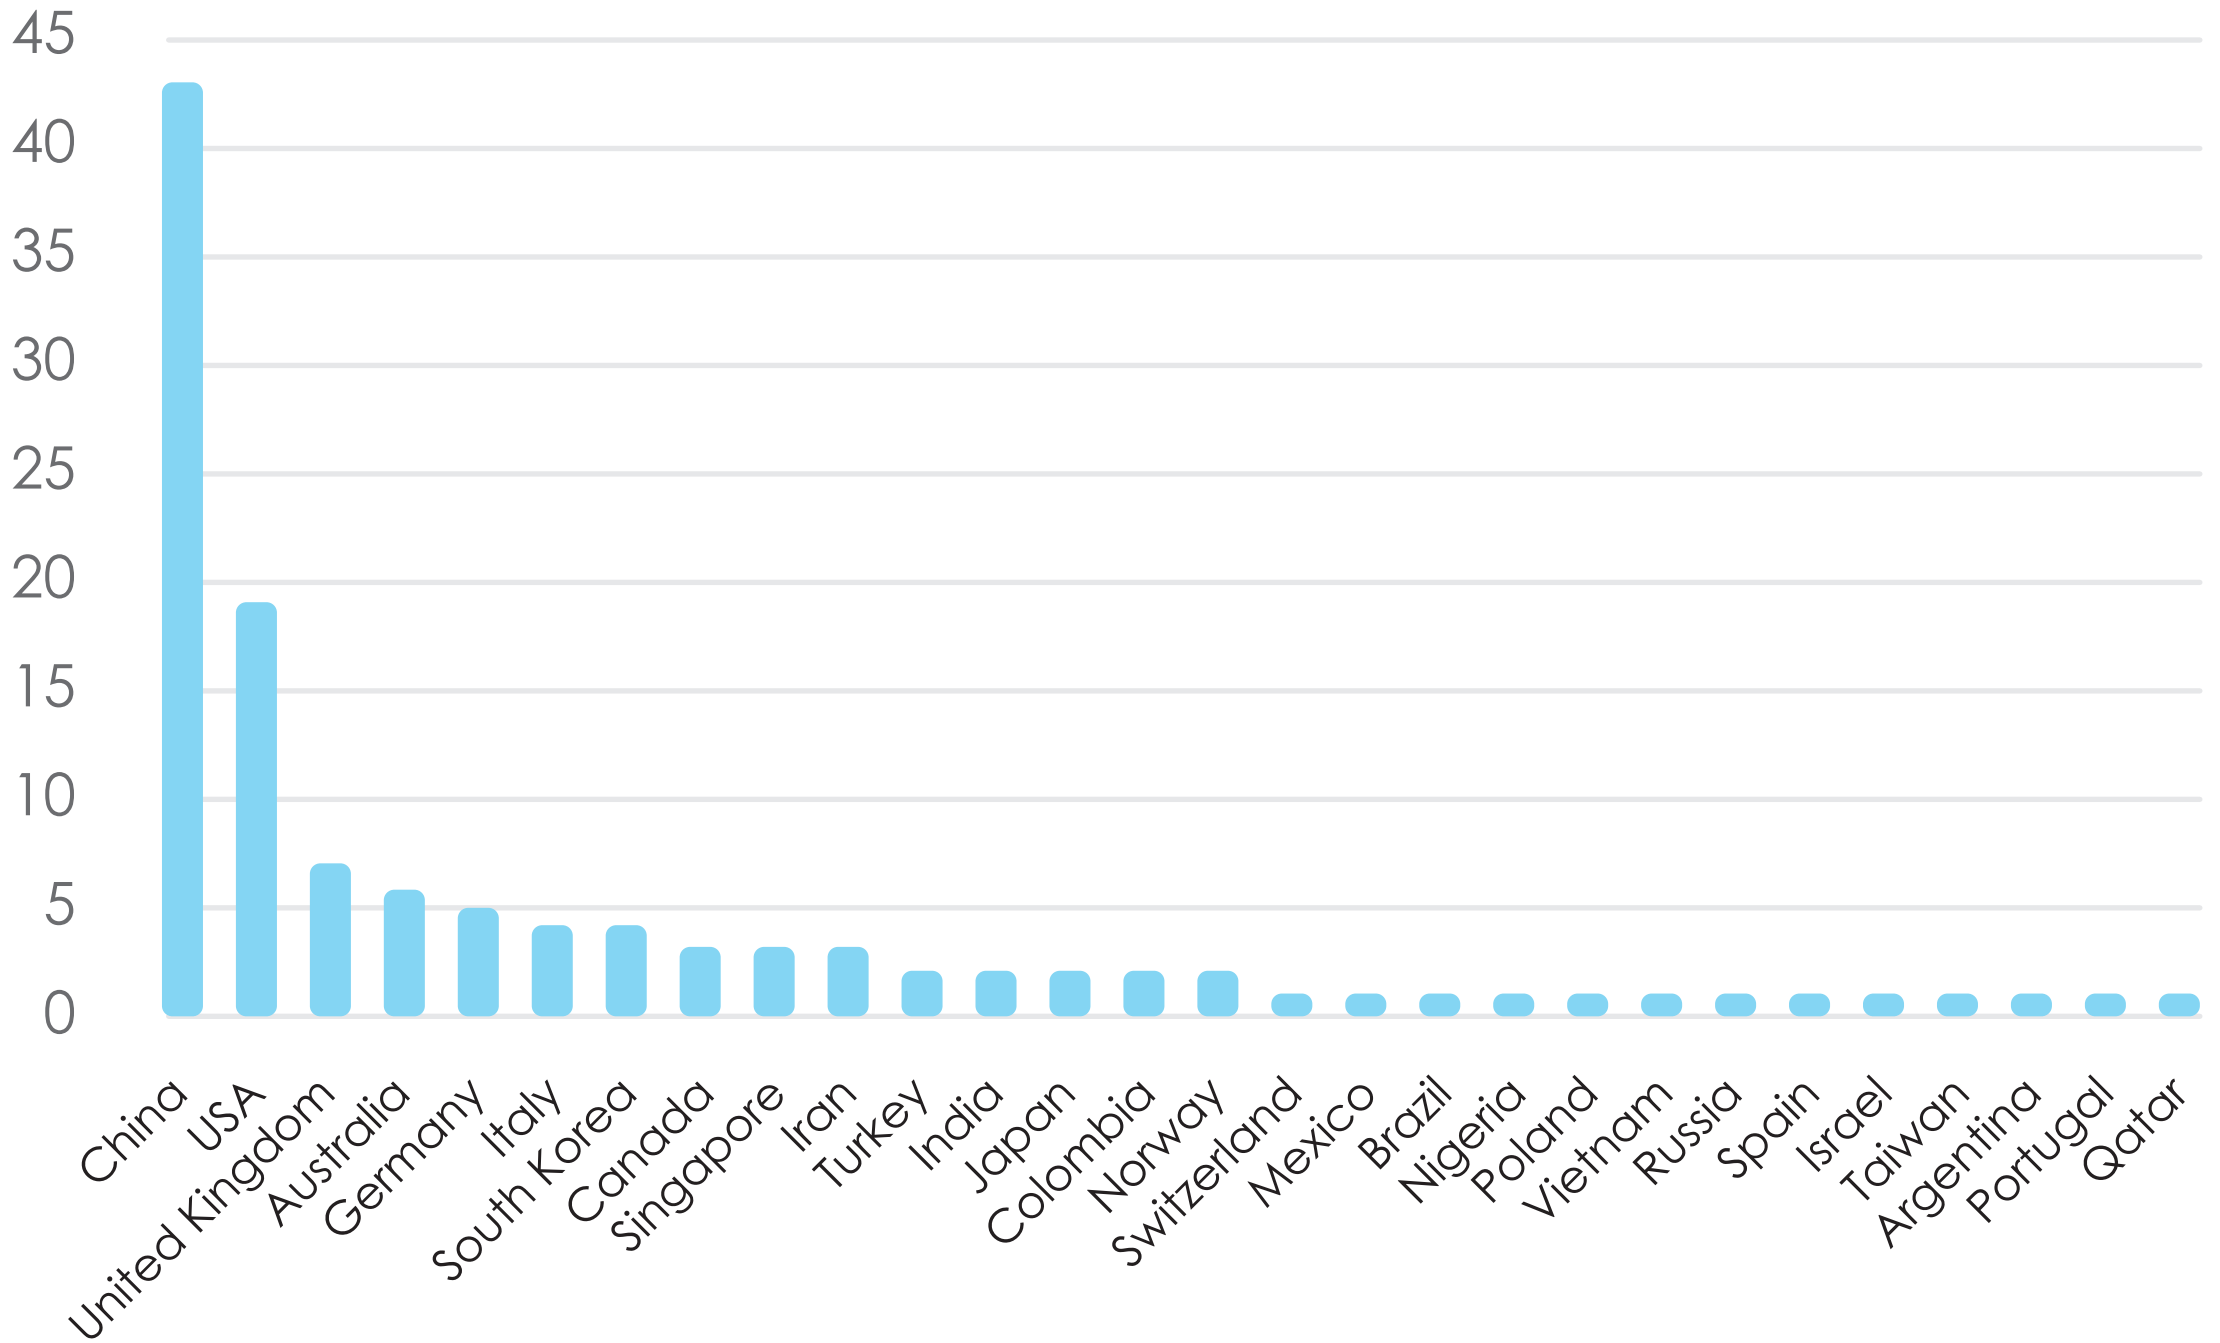

Supplement: s1 [file s1]
